# Supplementary material
Source: PubMed Central journal article supplement (PMC4508327)
Supplement: NIHMS703629-supplement-4_.pdf [file NIHMS703629-supplement-4_.pdf]

Shapiro et al.

**SUPPLEMENTAL INFORMATION**

**Supplemental Table 1.** Incidence and severity of treatment-related adverse events in ≥2 patients treated at the 10-, 21-, 43-, 89-mg dose levels

|                                      | 10 mg<br>N = 4      |             | 21 mg<br>N = 4  |                     |             | 43 mg<br>N = 4     |                     |             | 89 mg<br>N = 4  |                     |             |
|--------------------------------------|---------------------|-------------|-----------------|---------------------|-------------|--------------------|---------------------|-------------|-----------------|---------------------|-------------|
| AE <sup>^</sup>                      | All Grades<br>n (%) | G3<br>n (%) | AE <sup>^</sup> | All Grades<br>n (%) | G3<br>n (%) | AE <sup>^</sup>    | All Grades<br>n (%) | G3<br>n (%) | AE <sup>^</sup> | All Grades<br>n (%) | G3<br>n (%) |
| Any AE                               | 3 (75.0)            | 1 (25.0)    | Any AE          | 3 (75.0)            | 0           | Any AE             | 4 (100)             | 0           | Any AE          | 4 (100)             | 0           |
| Blood alkaline phosphatase increased | 2 (50.0)            | 0           | Nausea          | 2 (50.0)            | 0           | Decreased appetite | 2 (50.0)            | 0           | Diarrhea        | 2 (50.0)            | 0           |
| Fatigue                              | 2 (50.0)            | 0           |                 |                     |             |                    |                     |             | Rash            | 2 (50.0)            | 0           |

<sup>^</sup> No grade 4 and grade 5 treatment-related AEs were reported. AE, adverse event; G3, grade 3.

**Supplemental Table 2.** Incidence and severity of treatment-related adverse events in ≥2 patients treated at the 222-, 266-, and 319-mg dose levels

| 222 mg<br>N = 7                     |                     |             | 266 mg<br>N = 8                     |                     |             | 319 mg<br>N = 4                     |                     |             |
|-------------------------------------|---------------------|-------------|-------------------------------------|---------------------|-------------|-------------------------------------|---------------------|-------------|
| AE <sup>^</sup>                     | All Grades<br>n (%) | G3<br>n (%) | AE <sup>^</sup>                     | All Grades<br>n (%) | G3<br>n (%) | AE <sup>^</sup>                     | All Grades<br>n (%) | G3<br>n (%) |
| Any AE                              | 7 (100)             | 4 (57.1)    | Any AE                              | 8 (100)             | 4 (50.0)    | Any AE                              | 4 (100)             | 3 (75.0)    |
| Mucosal inflammation and stomatitis | 7 (100)             | 3 (42.9)    | Mucosal inflammation and stomatitis | 8 (100)             | 1 (12.5)    | Mucosal inflammation and stomatitis | 4 (100)             | 1 (25.0)    |
| Nausea                              | 3 (42.9)            | 0           | Rash                                | 6 (75.0)            | 1 (12.5)    | Hyperglycemia                       | 3 (75.0)            | 0           |
| Abdominal pain upper                | 2 (28.6)            | 0           | Nausea                              | 5 (62.5)            | 0           | Nausea                              | 3 (75.0)            | 0           |
| Constipation                        | 2 (28.6)            | 0           | Hyperglycemia                       | 4 (50.0)            | 2 (25.0)    | Anemia                              | 2 (50.0)            | 0           |
| Decreased appetite                  | 2 (28.6)            | 0           | Vomiting                            | 4 (50.0)            | 0           | Diarrhea                            | 2 (50.0)            | 1 (25.0)    |
| Dysgeusia                           | 2 (28.6)            | 0           | Fatigue                             | 3 (37.5)            | 0           | Fatigue                             | 2 (50.0)            | 0           |
| Fatigue                             | 2 (28.6)            | 0           | Pruritus                            | 3 (37.5)            | 0           | Paresthesia oral                    | 2 (50.0)            | 0           |
| Paresthesia oral                    | 2 (28.6)            | 0           | Arthralgia                          | 2 (25.0)            | 0           | Rash                                | 2 (50.0)            | 1 (25.0)    |
| Vomiting                            | 2 (28.6)            | 0           | Asthenia                            | 2 (25.0)            | 0           |                                     |                     |             |
|                                     |                     |             | Decreased appetite                  | 2 (25.0)            | 0           |                                     |                     |             |
|                                     |                     |             | Glycosylated hemoglobin increased   | 2 (25.0)            | 0           |                                     |                     |             |

<sup>^</sup> No grade 4 and grade 5 treatment-related AEs were reported. AE, adverse event; G3, grade 3.

**Supplemental Table 3.** Pharmacokinetic parameters for single-dose administration of PF-05212384 at the maximum tolerated dose

| Parameter                             | Cycle 1<br>N = 42 |                         |
|---------------------------------------|-------------------|-------------------------|
|                                       | n                 | 154 mg                  |
| AUC <sub>inf</sub><br>(ng.hr/mL)*     | 39                | 16,250<br>(28)          |
| AUC <sub>last</sub><br>(ng.hr/mL)*    | 42                | 15,780<br>(28)          |
| AUC <sub>tau</sub><br>(ng.hr/mL)*     | 42                | 15,810<br>(28)          |
| C <sub>max</sub><br>(ng/mL)*          | 42                | 9988<br>(28)            |
| T <sub>max</sub><br>(hr)**            | 42                | 0.467<br>(0.417, 0.667) |
| t <sub>1/2</sub> <sup>^</sup><br>(hr) | 39                | 35.84<br>(±6.25)        |
| CL<br>(L/hr)*                         | 39                | 9.475<br>(28)           |
| V <sub>ss</sub><br>(L)*               | 39                | 167.2<br>(35)           |

\*Geometric mean (%CV); \*\*median (range); ^arithmetic mean (±SD). AUC, area under the curve; CL, systemic clearance; C<sub>max</sub>, maximum plasma concentration; CV, coefficient of variation; SD, standard deviation; T<sub>max</sub>, time to maximum plasma concentration; T<sub>1/2</sub>, terminal half-life; V<sub>ss</sub>, volume of distribution at steady state.

**Supplemental Table 4.** Pharmacokinetic parameters for multiple-dose administration of PF-05212384 at the maximum tolerated dose

| Parameter                             | Cycle 2<br>N = 31 |                         |
|---------------------------------------|-------------------|-------------------------|
|                                       | n                 | 154 mg                  |
| AUC <sub>tau</sub><br>(ng.hr/mL)*     | 23                | 47,130<br>(54)          |
| C <sub>max</sub><br>(ng/mL)*          | 31                | 8594<br>(64)            |
| T <sub>max</sub><br>(hr)**            | 31                | 0.467<br>(0.417, 0.917) |
| t <sub>1/2</sub> <sup>^</sup><br>(hr) | 23                | 35.97<br>(±5.32)        |
| CL<br>(L/hr)*                         | 23                | 3.109<br>(53)           |
| V <sub>ss</sub><br>(L)*               | 23                | 29.77<br>(90)           |
| C <sub>avg</sub><br>(ng/mL)*          | 23                | 280.5<br>(54)           |
| C <sub>min</sub><br>(ng/mL)*          | 31                | 7.810<br>(58)           |
| R <sub>ac</sub> * <sup>*</sup>        | 23                | 2.930<br>(58)           |

\*Geometric mean (%CV); \*\*median (range); ^arithmetic mean (±SD). AUC, area under the curve; C<sub>avg</sub>, average plasma concentration; CL, systemic clearance; C<sub>max</sub>, maximum plasma concentration; C<sub>min</sub>, minimum plasma concentration; CV, coefficient of variation; R<sub>ac</sub>, accumulation ratio; SD, standard deviation; T<sub>max</sub>, time to maximum plasma concentration; T<sub>1/2</sub>, terminal half-life; V<sub>ss</sub>, volume of distribution at steady state.

**Supplemental Table 5.** Tumor responses to single-agent treatment with PF-05212384 in patients with advanced solid malignancies

| <b>Tumor Response</b>                            | <b>PF-05212384 (N = 77)</b><br><i>n (%)</i> |
|--------------------------------------------------|---------------------------------------------|
| Complete response                                | 0                                           |
| Partial response                                 | 2 (2.6)                                     |
| Stable/no response and time to failure ≥184 days | 8 (10.4)                                    |
| Stable/no response and time to failure <184 days | 19 (24.7)                                   |
| Objective progression                            | 38 (49.4)                                   |
| Symptomatic deterioration                        | 3 (3.9)                                     |
| Early death                                      | 1 (1.3)                                     |
| Indeterminate                                    | 6 (7.8)                                     |
| Clinical benefit response rate<br>[95% exact CI] | 10 (13.0)<br>[6.4, 22.6]                    |

CI, confidence interval.

**Supplemental Table 6.** Changes in glucose, insulin, and C-peptide levels from baseline in the maximum tolerated dose group

| <b>Changes in glucose levels from baseline</b>   | <b><i>N</i></b> | <b>Mean (SD)</b>    |
|--------------------------------------------------|-----------------|---------------------|
| <b>Baseline (mg/dL)</b>                          | <b>42</b>       | <b>97.2 (16.67)</b> |
| Cycle 1, day 2                                   | 40              | 13.7 (21.49)        |
| Cycle 1, day 8                                   | 41              | 8.9 (34.04)         |
| Cycle 1, day 15                                  | 38              | 11.0 (29.98)        |
| Cycle 1, day 22                                  | 39              | 13.4 (36.43)        |
| Cycle 2, day 1                                   | 33              | 2.8 (15.74)         |
| <b>Changes in insulin levels from baseline</b>   |                 |                     |
| <b>Baseline (mU/mL)</b>                          | <b>38</b>       | <b>13.6 (9.27)</b>  |
| Cycle 1, day 2                                   | 37              | 22.8 (25.68)        |
| Cycle 2, day 1                                   | 27              | 1.3 (8.66)          |
| Cycle 3, day 1                                   | 14              | -0.7 (11.66)        |
| Cycle 4, day 1                                   | 8               | 2.9 (6.35)          |
| Cycle 5, day 1                                   | 5               | 2.3 (5.24)          |
| <b>Changes in C-peptide levels from baseline</b> |                 |                     |
| <b>Baseline (ng/mL)</b>                          | <b>37</b>       | <b>2.9 (1.80)</b>   |
| Cycle 1, day 2                                   | 34              | 3.6 (2.23)          |
| Cycle 2, day 1                                   | 26              | 0.4 (1.36)          |
| Cycle 3, day 1                                   | 12              | 0.5 (1.15)          |
| Cycle 4, day 1                                   | 7               | 0.9 (1.45)          |
| Cycle 5, day 1                                   | 4               | 0.4 (0.86)          |

SD, standard deviation.

**Supplemental Table 7.** Changes in PI3K/mTOR activation biomarkers from baseline in tumor biopsies from patients treated in the maximum tolerated dose group

| <b>Biomarker</b>                          | <b>N</b> | <b>Mean (SD)</b> |
|-------------------------------------------|----------|------------------|
| <b>AKT S473</b>                           |          |                  |
| At screening (NFC)                        | 8        | 34.3 (26.82)     |
| Cycle 1/day 22 change from baseline (NFC) | 8        | -10.6 (34.70)    |
| <b>AKT T308</b>                           |          |                  |
| At screening (NFC)                        | 7        | 38.5 (25.80)     |
| Cycle 1/day 22 change from baseline (NFC) | 7        | -3.0 (23.61)     |
| <b>FKHR T24 FKHRL1 T32</b>                |          |                  |
| At screening (NFC)                        | 8        | 145.1 (113.99)   |
| Cycle 1/day 22 change from baseline (NFC) | 8        | -28.2 (83.50)    |
| <b>STAT3</b>                              |          |                  |
| At screening (NFC)                        | 7        | 231.4 (219.22)   |
| Cycle 1/day 22 change from baseline (NFC) | 7        | -56.9 (135.40)   |

NFC, normalized to cytokeratin; SD, standard deviation.
